# Analysis of Cutaneous Lymphomas in a Medical Center in Bahia, Brazil

Achiléa L. Bittencourt, MD, PhD,<sup>1</sup> Pedro D. Oliveira, MD,<sup>2</sup> Agnes C. Andrade, MS,<sup>1</sup> Tamara C. Santos, MD,<sup>1</sup> Rodrigo F. Oliveira, MS,<sup>1</sup> Lourdes Farré, PhD,<sup>3</sup> and Iguaracyra Araujo, MD, PhD<sup>1</sup>

From the <sup>1</sup>Department of Pathology and <sup>2</sup>Department of Dermatology, Hospital Universitário Prof Edgard Santos, Federal University of Bahia, Brazil; and <sup>3</sup>Laboratory of Experimental Pathology, CPqGM-FIOCRUZ, Bahia, Brazil.

**Key Words:** Cutaneous lymphoma; Mycosis fungoides; Adult T-cell leukemia lymphoma; HTLV-1 infection; Peripheral T-cell lymphoma unspecified; Anaplastic large cell lymphoma; Primary cutaneous B-cell lymphomas

DOI: 10.1309/AJCP52QGQPZWFHE

CME/SAM

## ABSTRACT

**Objectives:** To evaluate the frequency of the different types of cutaneous lymphoma (CL) in 1 university hospital in Brazil and compare this frequency with those observed in other countries.

**Methods:** After review, 72 (84.7%) cases of primary cutaneous T-cell lymphoma (CTCL) and 13 (15.3%) cases of primary cutaneous B-cell lymphoma (CBCL) were included.

**Results:** Of the CTCLs, 40.3% were mycosis fungoides (MF); 26.4% were adult T-cell leukemias/lymphomas (ATLs); 23.6% were peripheral T-cell lymphomas, unspecified; and 8.3% were anaplastic large cell lymphomas. Of the MF cases, 17.2% progressed to transformed MF. Five-year survival for primary human T-cell lymphotropic virus type 1–negative CTCL, ATL, and CBCL was 64.0%, 42.1%, and 62.5%, respectively. MF and ATL were the most frequent primary CTCLs.

**Conclusions:** The frequencies observed here are close to those observed in Peru but different from those of European countries. Unfortunately, the World Health Organization/ European Organization of Research and Treatment of Cancer classification does not include primary cutaneous ATL.

Upon completion of this activity you will be able to:

- compare the frequency of different cutaneous lymphomas types in diverse areas of the world.
- define the necessity of having serology for human T-cell lymphotropic virus type 1 for all patients with cutaneous T-cell lymphoma.
- discuss the fact that adult T-cell leukemia/lymphoma can present as a primary cutaneous form.
- analyze the features of transformed mycosis fungoides.

The ASCP is accredited by the Accreditation Council for Continuing Medical Education to provide continuing medical education for physicians. The ASCP designates this journal-based CME activity for a maximum of 1 AMA PRA Category 1 Credit™ per article. Physicians should claim only the credit commensurate with the extent of their participation in the activity. This activity qualifies as an American Board of Pathology Maintenance of Certification Part II Self-Assessment Module.

The authors of this article and the planning committee members and staff have no relevant financial relationships with commercial interests to disclose. Questions appear on p 440. Exam is located at [www.ascp.org/ajcpeme](http://www.ascp.org/ajcpeme).

Different types of lymphoproliferative diseases vary in frequency in different geographical areas, and this variation may be ascribed to genetic and environmental etiologic factors.<sup>1</sup> For example, while hydroa vacciniforme–like cutaneous lymphoma, a rare type of Epstein-Barr virus–associated lymphoma, is more common in children from Asia, Mexico, and Peru, it has not been reported in Brazil.<sup>2</sup> Likewise, in Brazil, adult T-cell leukemia/lymphoma (ATL), a disease caused by the human T-cell lymphotropic virus type 1 (HTLV-1), occurs predominantly in Bahia and Rio de Janeiro, while in other states, the disease has been reported rarely or not at all.<sup>3,4</sup>

After the gastrointestinal tract, the skin is the site most commonly affected by extranodal non-Hodgkin lymphomas (NHLs).<sup>5</sup> Accordingly, primary cutaneous NHL accounts for 18% of cases of extranodal NHL, with an estimated annual

incidence of 1 in 100,000.<sup>6</sup> Differentiation between primary and secondary cutaneous NHL is extremely important, since prognosis and treatment differ between the two.

Nevertheless, very few studies have reported on the frequency of cutaneous lymphoma (CL) in South America and on its clinical and pathologic characteristics,<sup>7-9</sup> with no studies having been conducted in Brazil. Therefore, it is of the utmost importance to evaluate the frequency of the different types of CL to identify the possible factors involved in the genesis of these tumors in South America.

This study was conducted in the pathology laboratory of the Professor Edgard Santos Teaching Hospital of the Federal University of Bahia in Salvador, Bahia, Brazil. The objective was to review and classify the diagnosis of CL made between January 1998 and December 2009 in unselected consecutive cases of CL, differentiating primary from secondary CL and evaluating prognosis. A further aim was to compare the frequency of primary CL observed here with rates reported in other countries, as well as evaluate the applicability of the World Health Organization/European Organization of Research and Treatment of Cancer (WHO/EORTC) classification for a diagnosis of CL in the present study.

## Materials and Methods

A total of 153 consecutive and unselected cases were retrieved from the records at the pathology laboratory of the Federal University of Bahia's Teaching Hospital in Salvador, Bahia, Brazil. The period evaluated was from January 1998 through December 2009. Of these 153 cases, 131 consisted of NHL with cutaneous involvement and 22 of cutaneous lymphoid hyperplasia. All these cases referred to adult patients. The inclusion criteria for histologic review were (1) cases involving patients older than 18 years and (2) cases in which the initial diagnosis was made between 1998 and 2009. The exclusion criteria consisted of (1) cases in which the material remaining in paraffin blocks was insufficient for further immunohistochemical analysis and (2) cases in which serology for HTLV-1 and human immunodeficiency virus (HIV) had not been performed. Following application of these criteria, 137 (115 of CL and 22 of lymphoid hyperplasia) cases were then included in the study and subsequently reviewed.

The original diagnosis in the 115 cases of CL included 64 cases of cutaneous T-cell lymphoma (CTCL), 38 cases of ATL, 2 cases of precursor T-cell lymphoma infiltrating the skin, and 11 cases of cutaneous B-cell lymphoma (CBCL). Primary skin involvement was defined as the presence of CL without leukemia, nodal, or visceral involvement after staging procedures. Clinical data analyzed included age and sex of patients, data of diagnosis, and duration of follow-up. The status of the patients was considered as follows: (1) alive without

disease, (2) alive with disease, or (3) dead. The follow-up of the patients was evaluated until December 2012.

The ATL cases were diagnosed and clinically classified according to preexisting criteria.<sup>3,10,11</sup> In all cases of smoldering ATL, only the skin was affected, there were no atypical cells or less than 5% of atypical cells in peripheral blood, there was no lymphocytosis or hypercalcemia, and lactate dehydrogenase levels were low. The smoldering and primary cutaneous tumoral (PCT) types of ATL were considered to represent cases of primary CL.<sup>3</sup> In 11 ATL cases, analysis of clonality using Southern blot<sup>12</sup> or long-inverse polymerase chain reaction<sup>13</sup> was performed.

## Histopathologic and Immunohistochemical Studies

In each case, the original diagnosis was reviewed by at least 2 pathologists (A.L.B. and I.A.) with experience in lymphomas, based on clinicopathologic criteria, according to the WHO/EORTC classification of primary CL.<sup>5</sup> Immunohistochemical studies of the paraffin sections were carried out using immunoperoxidase procedures (avidin-biotin-peroxidase complex method). The antibodies employed in these cases were CD3, CD4, CD7, CD8, UCHL-1, and/or OPD4, CD20, CD30, CD68, and Ki-67. For ATL cases, the antibodies CD2, CD5, and CD25 also were used. All the CTCLs with large cells were stained for CD30 and the anaplastic large cell lymphomas (ALCLs) for anaplastic lymphoma kinase-1 (ALK-1). For B-cell lymphomas, the following markers were used: CD5, CD10, CD20, CD79a, CD23, CD38, CD43, Bcl-2, and Bcl-6 and, in some cases, cyclin D1. Monotypic expression of immunoglobulin light chains was also assessed. For precursor lymphomas, the markers TdT, LCA, CD10, CD34, CD56, and myeloperoxidase were also employed. Histologically, mycosis fungoides (MF)/Sézary syndrome (MF/SS) was classified as transformed MF (T-MF) if the biopsy specimen showed large cells exceeding 25% of the infiltration or if they formed microscopic nodules in at least 1 skin biopsy specimen.<sup>14</sup> When necessary, analysis of the genic rearrangement of the T-cell receptor<sup>15</sup> was performed for differential diagnosis between lymphoma and lymphoid hyperplasia. The protocol of the present study was approved by the Institutional Review Board of the Federal University of Bahia's Teaching Hospital.

## Statistical Analysis

Clinical data were collected from the medical records and included in tables created using Excel (Microsoft, Redmond, WA), then exported to the SPSS version 20.0 (SPSS, Chicago, IL) for statistical analysis. Data were registered sequentially using a coding system to preserve patients' anonymity. Analysis was conducted of their demographic characteristics, the frequency of histologic patterns, and survival, the latter being calculated using the Kaplan-Meier method. The log rank test was used to compare the median survival time (MST)

between cases of primary and secondary lymphomas and to compare the MST in cases of CTCL, ATL, and CBCL.

## Results

Following review and further ancillary studies, few cases of CL were determined to be a different category of disease, and 3 cases of lymphoid hyperplasia were reconsidered as CL. In total, 112 cases of CL were evaluated in this study. Of these, 60 consisted of HTLV-1–negative CTCL, 37 of ATL, 2 of precursor T-cell lymphoma, and 13 of CBCL. There was a predominance of primary CL ( $n = 85$ ; 75.9%) over secondary CL ( $n = 27$ ; 24.1%). Of the 85 cases of primary CL, 72 (84.7%) consisted of CTCL and only 13 (15.3%) of CBCL **Table 1**. The histologic diagnoses of the cases of primary and secondary CL are shown in **Table 2**, as well as their frequencies.

The mean (SD) age of the overall population with CL was 56.1 (16.4) years, while the mean (SD) age of the patients in the HTLV-1–negative CTCL group was 54.7 (16.0) years vs 54.6 (15.9) years in the ATL group and 66.7 (18.2) years

in the CBCL group. With respect to sex, 53.6% of the overall population was female, while 46.4% was male.

Cases of MF included 3 cases of follicular MF, 2 cases of SS, 1 case of T-MF, and 1 case of granulomatous slack skin. Most cases of peripheral T-cell lymphoma, unspecified (PTCL-U), had primary involvement of the skin. All cases of ALCL were ALK-1 negative, with 6 having primary and 2 secondary skin involvement. One of these cases consisted of primary cutaneous folliculotropic and lymphohistiocytic ALCL, and the other was of primary cutaneous eosinophil-rich ALCL. Both cases have already been published.<sup>16,17</sup>

With respect to the clinical type, 16 of the 37 cases of ATL were of the smoldering type, 11 were chronic, 4 were acute, 3 were of the lymphoma type, and 3 were of the PCT type. In 19 cases, a microscopic pattern of MF was present **Image 1**, while there were 16 cases of PTCL-U **Image 2** and 2 of ALCL, both of which were ALK-1 negative. Some cases of ATL presented uncommon aspects, such as an MF dyshidrosis-like pattern **Image 3A** and **Image 3B**,<sup>18</sup> purpuric cutaneous lesions,<sup>19</sup> or an association of hyalohyphomycosis and ATL in the same lesions.<sup>20</sup> In general, 33% of the

**Table 1**  
Primary and Secondary Cutaneous Lymphomas

| Lymphoma  | Precursor T-Cell Lymphomas, No. | HTLV-1–Negative T-Cell Lymphomas, No. | ATLs, No. | B-Cell Lymphomas, No. | Total No. (%) |
|-----------|---------------------------------|---------------------------------------|-----------|-----------------------|---------------|
| Primary   | —                               | 53                                    | 19        | 13                    | 85 (75.9)     |
| Secondary | 2                               | 7                                     | 18        | 0                     | 27 (24.1)     |
| Total     | 2                               | 60                                    | 37        | 13                    | 112 (100.0)   |

ATL, adult T-cell leukemia/lymphoma; HTLV-1, human T-cell lymphotropic virus type 1.

**Table 2**  
Patients' Histologic Diagnoses and Current Status

| Lymphoma                                       | Alive and Well, No. | Alive With Disease, No. | Dead, No. | Without Follow-up, No. | Total No. (%) |
|------------------------------------------------|---------------------|-------------------------|-----------|------------------------|---------------|
| Primary cutaneous T-cell lymphomas             | 72 (100.0)          |                         |           |                        |               |
| MF/SS                                          | 2                   | 13                      | 10        | 4                      | 29 (40.3)     |
| PTCL-unspecified                               | —                   | 9                       | 6         | 2                      | 17 (23.6)     |
| ALCL                                           | 3                   | 2                       | 1         | —                      | 6 (8.3)       |
| Lymphomatoid papulosis                         | 1                   | —                       | —         | —                      | 1 (1.4)       |
| ATL                                            | —                   | 8                       | 11        | —                      | 19 (26.4)     |
| Secondary cutaneous T-cell lymphomas           | 27 (100.0)          |                         |           |                        |               |
| PTCL-unspecified                               | 1                   | 1                       | 1         | —                      | 3 (11.1)      |
| ALCL                                           | —                   | 1                       | 1         | —                      | 2 (7.4)       |
| Aggressive epidermotropic CD8+ T-cell lymphoma | —                   | —                       | 1         | —                      | 1 (3.7)       |
| Extranodal NK/T-cell lymphoma nonnasal type    | —                   | —                       | 1         | —                      | 1 (3.7)       |
| Lymphoblastic T-cell lymphoma                  | —                   | —                       | 1         | 1                      | 2 (7.4)       |
| ATL                                            | —                   | 2                       | 16        | —                      | 18 (66.7)     |
| Primary cutaneous B-cell lymphomas             | 13 (100.0)          |                         |           |                        |               |
| MZBL                                           | 1                   | 3                       | —         | —                      | 4 (30.8)      |
| FCL                                            | 1                   | 1                       | 1         | 2                      | 5 (38.5)      |
| DLBCL, leg type                                | —                   | 3                       | —         | —                      | 3 (23.0)      |
| DLBCL, others                                  | 1                   | —                       | —         | —                      | 1 (7.7)       |

ALCL, anaplastic large cell lymphoma; ATL, adult T-cell leukemia/lymphoma; DLBCL, diffuse large B-cell lymphoma; FCL, follicle center lymphoma; MF, mycosis fungoides; MZBL, marginal zone B-cell lymphoma; NK, natural killer; PTCL, peripheral T-cell lymphoma; SS, Sézary syndrome.

CTCLs consisted of cases of ATL. Of the cases of primary CTCL, 26.4% consisted of primary cutaneous ATL (smoldering and PCT types) and 73.6% of primary cutaneous HTLV-1–negative CTCL. All CBCL cases were HIV negative and had primary involvement of the skin (Table 2).

### Follow-up

Of the entire group, we lost 9 patients to follow-up (Table 2). Progression to T-MF was observed in 4 MF cases, with 3

progressing to CD30-negative large cell lymphoma and 1 to CD30-positive large cell lymphoma. In 1 case, transformation also occurred in a superficial lymph node. In the case diagnosed as T-MF during review, in which transformation to a CD30-negative large cell lymphoma occurred, the lesions progressed despite treatment, but this patient is still alive. Three of the 5 patients with T-MF have died, and 2 remain alive with the disease. Two other patients were considered to have MF in transformation, since lesions were present with

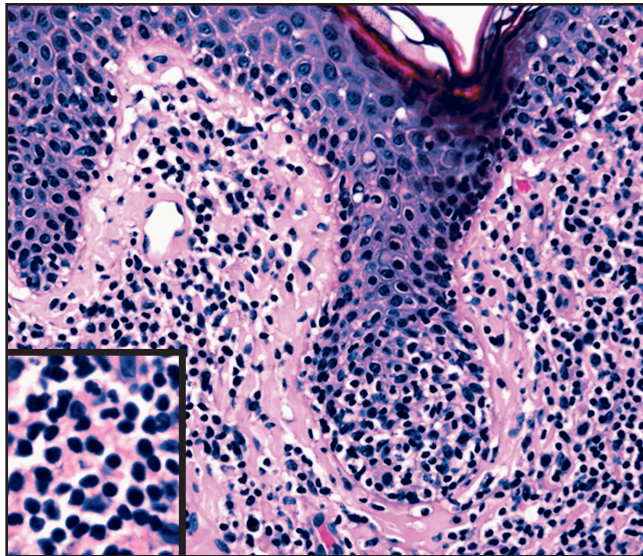

**Image 1** Mycosis fungoides–like adult T-cell leukemia/lymphoma. Infiltration of small and atypical lymphocytes in the upper dermis with epidermotropism (H&E;  $\times 250$ ). Inset: Higher magnification of the infiltrate (H&E;  $\times 500$ ).

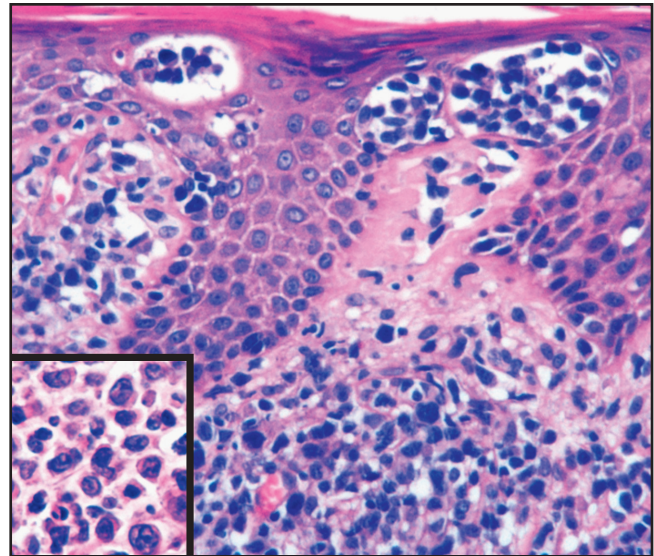

**Image 2** Adult T-cell leukemia/lymphoma. Unspecified peripheral T-cell lymphoma pattern. Pleomorphic medium and large cells infiltrating the dermis with Pautrier abscesses (H&E;  $\times 320$ ). Inset: Higher magnification of the pleomorphic cells (H&E;  $\times 500$ ).

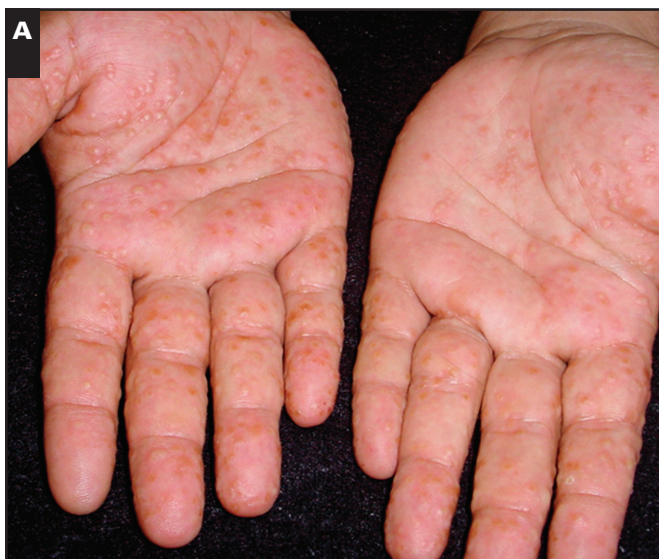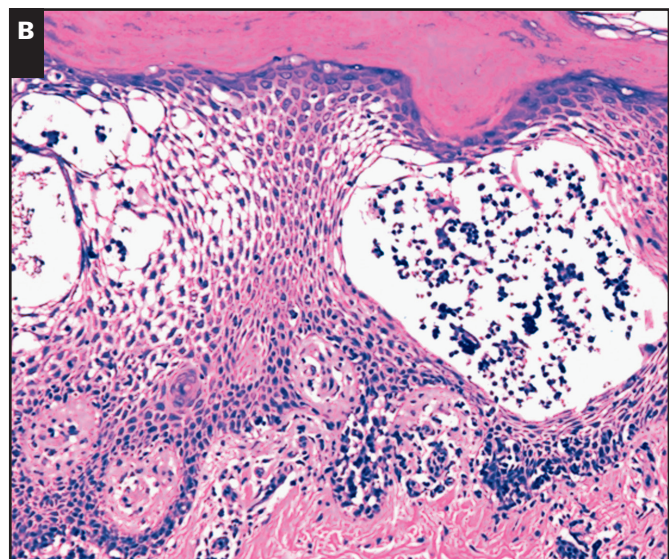

**Image 3** Dyshidrosis-like variant of adult T-cell leukemia/lymphoma. **A**, Many vesicles on the palms of both hands. **B**, The epidermis shows spongiosis and large intraepidermal vesicles with atypical lymphocytes (H&E;  $\times 100$ ).

many large cells during the course of the disease; however, these cells did not exceed 25%. Both of these patients died, at 68 and 38 months, respectively, from having developed the disease and despite treatment.

Of the cases of primary HTLV-1-negative CTCL for which follow-up was available, 30 patients are alive, while 17 have died. Of the 10 deaths in patients with MF/SS, 3 were due to T-MF, 2 to MF in transformation as mentioned above, 2 to follicular MF, 1 to erythrodermic MF (stage IIIa), and 2 to an unknown cause. Of the 11 deaths in primary ATL cases, 3 corresponded to PCT, 1 to progression of the smoldering type to PCT, and the others to infection or unrelated diseases. The lesions in the patient with lymphomatoid papulosis disappeared completely. The 2 deaths that occurred in patients with primary ALCL were due to other causes.

### Evaluation of Survival

The MST for the entire population was 48 months. There was a statistically significant difference of MST between primary and secondary CL ( $P = .0001$ ). The primary HTLV-1-negative CTCL group presented the longer MST in comparison to primary ATL and CBCL cases, but this difference was not statistically significant (Table 3).

### Discussion

Evaluations on the frequency of CL in South America are rare, and sample sizes are generally small. In 2 evaluations carried out in Argentina, one with 57 cases of CL over a 10-year period and the other with 39 cases of CTCL over a 16-year period, no pathologic or immunohistochemical review of the material was performed.<sup>7,8</sup> An evaluation of primary CL that included a review of the pathology findings in 65 cases in Lima, Peru, showed that 83.4% of cases consisted of CTCL and only 16.6% of CBCL.<sup>9</sup> These findings are similar to the results of the present study, in which 84.7% of the cases consisted of primary CTCL and 15.3% of

primary CBCL. Studies conducted in Japan and Korea also showed a marked predominance of primary CTCL in relation to CBCL.<sup>1,21-23</sup> Notwithstanding, in the European studies, although CTCL is more common than CBCL, this difference is much less marked compared with that found in the present study.<sup>24-26</sup> In the WHO/EORTC classification, in which 1,905 cases of primary CL were reclassified, 77.5% of cases corresponded to CTCL and 22.5% to CBCL.<sup>27</sup> However, no case of primary ATL was included in that register, probably because ATL is not endemic in Europe. Furthermore, in the WHO/EORTC classification, ATL is considered exclusively as secondary CL.<sup>28</sup>

In the present evaluation, the most common type of CTCL was MF (40.3%), followed by primary cutaneous ATL (26.4%). Included in MF were 2 cases of SS, 3 cases of follicular MF, and 1 case of granulomatous slack skin. MF/SS was less common compared with the European data<sup>24-26</sup> but similar to the findings of Fujita et al<sup>23</sup> in Japan. The results of the present study are closer to those found in Lima, Peru, where 46% of cases corresponded to MF/SS and 19.4% to primary cutaneous ATL.<sup>9</sup> In another evaluation conducted in Osaka, Japan, the percentage of cases of MF/SS in primary CTCL was even smaller at 33%.<sup>21</sup> The ATL cases, in general, represented 33% of T-cell lymphomas and 26.4% of primary cutaneous T-cell lymphomas. In Rio de Janeiro, Brazil, an evaluation of 188 cases of T-cell malignancies in general revealed a frequency of 26.5% of ATL cases.<sup>4</sup> The frequency of ATL in the present CTCL cases is high because Salvador, Bahia, Brazil is an endemic area for HTLV-1 infection.<sup>29</sup> Notwithstanding, this high frequency may in part reflect a biased recruitment of ATL cases in the pathology laboratory of the university teaching hospital, since this is a reference center for ATL studies. The frequency of PTCL-U was higher compared with that found in other studies,<sup>27</sup> possibly because some cases of T-MF may have been included in this diagnosis. In a few cases diagnosed as PTCL-U, it proved impossible to obtain the patients' previous clinical history and previous biopsy specimens for review. In relation to ALCL,

**Table 3**  
Median Survival Time in Primary and Secondary Cutaneous Lymphomas

| Lymphoma             | No. of Cases | MST, mo | 2-y Survival, % | 5-y Survival, % |
|----------------------|--------------|---------|-----------------|-----------------|
| Primary              | 76           | 109     | 75.3            | 57.5            |
| HTLV-1-negative CTCL | 47           | 109     | 80.6            | 64.0            |
| ATL                  | 19           | 47      | 68.4            | 42.1            |
| CBCL                 | 10           | 65      | 62.5            | 62.5            |
| Secondary            | 26           | 11      | 38.5            | 19.2            |
| Precursor CTCL       | 1            | 6       | 0               | 0               |
| HTLV-1-negative CTCL | 7            | 19      | 42.9            | 42.9            |
| ATL                  | 18           | 11      | 38.9            | 11.1            |
| Global               | 112          | 48      | 65.5            | 46.3            |

ATL, adult T-cell leukemia/lymphoma; CBCL, cutaneous B-cell lymphoma; CTCL, cutaneous T-cell lymphoma; HTLV-1, human T-cell lymphotropic virus type 1; MST, median survival time.

the frequency found in the present study was similar to that reported in other studies.<sup>23,25</sup>

In view of the common difficulty found in performing a differential diagnosis between CL and lymphoid hyperplasias,<sup>30</sup> these conditions were reviewed and 2 cases of lymphoid hyperplasia were rediagnosed as marginal B-cell lymphoma and another as ALCL. Of the cases of CBCL, the most common type of lymphoma was the centrofollicular type, and this finding is in agreement with reports from other studies.<sup>5,28</sup>

Five cases of T-MF were found in the group of CTCL: 1 that had been previously diagnosed as MF and 4 observed during disease progression. Only 1 progressed to CD30-positive large cell lymphoma and, curiously, this was the case with the poorest prognosis. In all 5 of these cases, clinical and histologic transformation was seen concomitantly, and 3 of these patients have already died.

The MST was longer in HTLV-1-negative CTCL than in ATL and CBCL, but the difference was not statistically significant. Among the cases of smoldering ATL, most of the deaths were due to infection or other causes, but among the PCT type, all deaths were due to a severe cutaneous dissemination of tumors. There is a great difference in the MST between those with primary and secondary T-cell lymphomas, which indicates the importance of differentiating these 2 types of CTCL.

The Brazilian and Japanese experiences had shown that ATL may also appear primarily in the skin.<sup>31-33</sup> Although the Japanese authors do not refer to primary cutaneous ATL, their published reports about cutaneous ATL really correspond to primary cutaneous ATL.<sup>32,33</sup> Thus, it is important that the Latin American countries with a high prevalence of HTLV-1 infection share their experiences and, together with Japan, should include this entity in the next primary CL international classification. It is important to emphasize that primary cutaneous ATL has a much better prognosis than secondary cutaneous ATL, as observed in the present study, confirming previous observations.<sup>31</sup>

*Supported by Conselho Nacional de Pesquisa (CNPq) and Fundação de Apoio à Pesquisa do Estado da Bahia (FAPESB), Bahia, Brazil.*

*Address correspondence to Dr Bittencourt: Serviço de Anatomia Patológica—Complexo Hospitalar Universitário Prof Edgard Santos, Rua Dr. Augusto Viana, s/n – Canela – CEP: 40.110-160, Salvador, Bahia, Brasil; e-mail: achilea@uol.com.br.*

## References

- Lee MW; Korean Dermatopathology Research Group. Characteristics of cutaneous lymphomas in Korea. *Clin Exp Dermatol.* 2003;28:639-646.
- Rodríguez-Pinilla SM, Barrionuevo C, Garcia J, et al. EBV-associated cutaneous NK/T-cell lymphoma: review of a series of 14 cases from Peru in children and young adults. *Am J Surg Pathol.* 2010;34:1773-1782.
- Bittencourt AL, Vieira MG, Brites CR, et al. Adult T-cell leukemia/lymphoma in Bahia, Brazil: analysis of prognostic factors in a group of 70 patients. *Am J Clin Pathol.* 2007;128:875-882.
- Pombo de Oliveira MS, Matutes E, Schulz T, et al. T-cell malignancies in Brazil: clinico-pathological and molecular studies of HTLV-I positive and negative cases. *Int J Cancer.* 1995;60:823-827.
- Willemze R, Kerl H, Sterry W, et al. EORTC classification for primary cutaneous lymphomas: a proposal from the Cutaneous Lymphoma Study Group of the European Organization for Research and Treatment of Cancer. *Blood.* 1997;90:354-371.
- Groves FD, Linet MS, Travis LB, et al. Cancer surveillance series: non-Hodgkin's lymphoma incidence by histologic subtype in the United States from 1978 through 1995. *J Natl Cancer Inst.* 2000;92:1240-1251.
- Del Aguila R, Gimenez L, Molinari M, et al. Retrospective study of cutaneous lymphomas relationship with WHO/EORTC classification. In: *Book of Abstracts of 21st World Congress of Dermatology.* Buenos Aires, Argentina: International League of Dermatological Societies; 2007. Abstract 5587.
- Hassan ML, Oro G, Sanz I, et al. T-cell cutaneous lymphomas: a 16-year study. In: *Book of Abstracts of 21st World Congress of Dermatology.* Buenos Aires, Argentina: International League of Dermatological Societies; 2007. Abstract 5545.
- Gárate BB, Luna DM, Ávila PQ, et al. Linfomas cutâneos primários: estudo retrospectivo clinicopatológico durante el período 1997-2004 em el Hospital Edgardo Rebagliati Martins, Essalud, Lima, Perú. *Acta Med Per.* 2008;25:81-84.
- Shimoyama M. Diagnostic criteria and classification of clinical subtypes of adult T-cell leukaemia-lymphoma. *Br J Haematol.* 1991;79:428-437.
- Tsukasaki K, Hermine O, Bazarbachi A, et al. Definition, prognostic factors, treatment and response criteria of adult T-cell leukemia-lymphoma: a proposal from an international consensus meeting. *J Clin Oncol.* 2009;27:453-459.
- Kamihira S, Sugahara K, Tsuruda K, et al. Proviral status of HTLV-1 integrated into the host genomic DNA of adult T-cell leukemia cells. *Clin Lab Haematol.* 2005;27:235-241.
- Etoh K, Tamiya S, Yamaguchi K, et al. Persistent clonal proliferation of human T-lymphotropic virus type I-infected cells in vivo. *Cancer Res.* 1997;57:4862-4867.
- Diamandidou E, Colome-Grimmer M, Fayad L, et al. Transformation of mycosis fungoides/Sézary syndrome: clinical characteristics and prognosis. *Blood.* 1998;92:1150-1159.
- Diss TC, Watts M, Pan LX, et al. The polymerase chain reaction in the demonstration of monoclonality in T cell lymphomas. *J Clin Pathol.* 1995;48:1045-1050.
- Bittencourt AL, Oliveira RF, Santos JB. Primary cutaneous folliculotropic and lymphohistiocytic anaplastic large cell lymphoma: a case report. *J Cutan Med Surg.* 2011;15:172-176.
- Bittencourt AL, Rothers S, Boente P, et al. Primary cutaneous eosinophil-rich anaplastic large cell lymphoma: report of an unusual case and literature review. *J Cutan Med Surg.* 2008;12:88-92.
- Bittencourt AL, Mota K, Oliveira RF, et al. A dyshidrosis-like variant of adult T-cell leukemia/lymphoma with clinicopathological aspects of mycosis fungoides: a case report. *Am J Dermatopathol.* 2009;31:834-837.

19. Oliveira PD, Torres ISM, Oliveira RF, et al. Acute adult T-cell leukemia/lymphoma (ATL) presenting with cutaneous purpuric lesions: a rare presentation. *Acta Oncol.* 2010;1:1-3.
20. Castanheira AO, Bittencourt AL, Santos HHM, et al. An uncommon association of adult T-cell leukemia/lymphoma with hyalohyphomycosis. Paper presented at: 14th International Conference on Human Retrovirology: HTLV and Related Retroviruses; July 1-4, 2009; Salvador, Bahia, Brazil.
21. Nagasawa T, Miwa H, Nakatsuka S, et al. Characteristics of cutaneous lymphomas in Osaka, Japan (1988-1999) based on the European Organization for Research and Treatment of Cancer classification. *Am J Dermatopathol.* 2000;22:510-514.
22. Yasukawa K, Kato N, Kodama K, et al. The spectrum of cutaneous lymphomas in Japan: a study of 62 cases based on the World Health Organization classification. *J Cutan Pathol.* 2006;33:487-491.
23. Fujita A, Hamada T, Iwatsuki K. Retrospective analysis of 133 patients with cutaneous lymphomas from a single Japanese medical center between 1995 and 2008. *J Dermatol.* 2011;38:524-530.
24. Bouaziz JD, Bastuji-Garin S, Poszepczynska-Guigné E, et al. Relative frequency and survival of patients with primary cutaneous lymphomas: data from a single-centre study of 203 patients. *Br J Dermatol.* 2006;154:1206-1207.
25. Jenni D, Karpova MB, Seifert B, et al. Primary cutaneous lymphoma: two-decade comparison in a population of 263 cases from a Swiss tertiary referral centre. *Br J Dermatol.* 2011;164:1071-1077.
26. Fink-Puches R, Zenahlik P, Bäck B, et al. Primary cutaneous lymphomas: applicability of current classification schemes (European Organization for Research and Treatment of Cancer, World Health Organization) based on clinicopathologic features observed in a large group of patients. *Blood.* 2002;99:800-805.
27. Willemze R, Jaffe ES, Burg G, et al. WHO-EORTC classification for cutaneous lymphomas. *Blood.* 2005;105:3768-3785.
28. Burg G, Kempf W, Cozzio A, et al. WHO/EORTC classification of cutaneous lymphomas: histological and molecular aspects. *J Cutan Pathol.* 2005;32:647-674.
29. Dourado I, Alcantara LCJ, Barreto ML, et al. HTLV-I in the general population of Salvador, Brazil: a city with African ethnic and sociodemographic characteristics. *J Acquir Immune Defic Syndr.* 2003;34:527-531.
30. Arai E, Shimizu M, Hirose T. A review of 55 cases of cutaneous lymphoid hyperplasia: reassessment of the histopathologic findings leading to reclassification of 4 lesions as cutaneous marginal zone lymphoma and 19 as pseudolymphomatous folliculitis. *Hum Pathol.* 2005;36:505-511.
31. Bittencourt AL, Barbosa HS, Vieira MD, et al. Adult T-cell leukemia/lymphoma (ATL) presenting in the skin: clinical, histological and immunohistochemical features of 52 cases. *Acta Oncol.* 2009;48:598-604.
32. Johno M, Ohishi M, Kojo Y, et al. Cutaneous manifestations of adult T-cell leukemia/lymphoma. In: Takatsuki K, Hinuma Y, Yoshida M, eds. *Advances in Adult T-Cell Leukemia and HTLV-1.* Tokyo, Japan: Scientific Society Press; 1992:33-42. Research Gann Monograph on Cancer Research No. 19.
33. Amano M, Kurokawa M, Ogata K, et al. New entity, definition and diagnostic criteria of cutaneous adult T-cell leukemia/lymphoma: human T-lymphotropic virus type 1 proviral DNA load can distinguish between cutaneous and smoldering types. *J Dermatol.* 2008;35:270-275.

# First and Only FDA Cleared Digital Cytology System

**Genius™ Cervical AI**

**Genius™ Review Station**

**Genius™ Digital Imager**

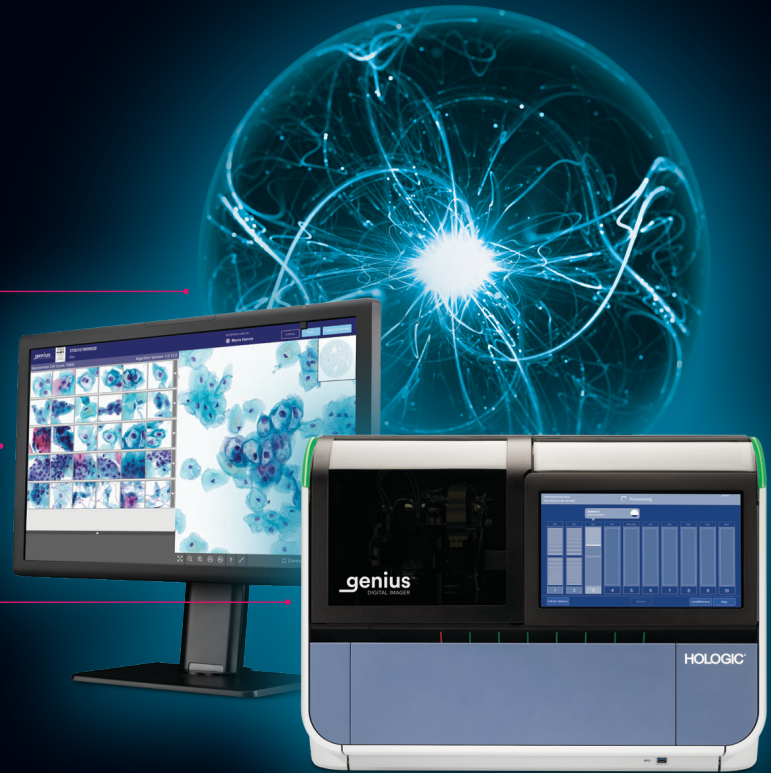

## Empower Your Genius With Ours

Make a Greater Impact on Cervical Cancer  
with the Advanced Technology of the  
Genius™ Digital Diagnostics System

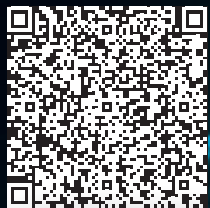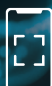

Click or Scan  
to discover more

ADS-04159-001 Rev 001 © 2024 Hologic, Inc. All rights reserved. Hologic, Genius, and associated logos are trademarks and/or registered trademarks of Hologic, Inc. and/or its subsidiaries in the United States and/or other countries. This information is intended for medical professionals in the U.S. and other markets and is not intended as a product solicitation or promotion where such activities are prohibited. Because Hologic materials are distributed through websites, podcasts and tradeshows, it is not always possible to control where such materials appear. For specific information on what products are available for sale in a particular country, please contact your Hologic representative or write to [diagnostic.solutions@hologic.com](mailto:diagnostic.solutions@hologic.com).

**genius™**  
DIGITAL DIAGNOSTICS
